# Supplementary material
Source: publisher figshare collection journal article supplement (https://acs.figshare.com/ndownloader/files/3777133)
Supplement: Supplementary file 1 [file 3777133]

## Supplementary Material

**Supplementary Table S1.** Student's t-test shows significant ( $p < 0.05$ ) and almost significant ( $p < 0.1$ ) alterations in kidney and plasma metabolites between GC-treated and control mice.

| Kidney | 8W         | p-values | 12W      | p-values | 16W           | p-values |
|--------|------------|----------|----------|----------|---------------|----------|
|        | Fumarate   | 0.031    |          |          | 2-HB          | 0.044    |
|        | Inosine    | 0.046    |          |          | 4-AB          | 0.055    |
|        | Xanthine   | 0.078    |          |          | Uridine       | 0.064    |
|        | Uracil     | 0.041    |          |          | Acetone       | 0.069    |
|        |            |          |          |          | 3-HB          | 0.072    |
|        |            |          |          |          | Citrate       | 0.083    |
| Plasma | Creatine   | 0.013    | Tyrosine | 0.037    | Creatinine    | 0.016    |
|        | Creatinine | 0.066    | Valine   | 0.080    | Phenylacetate | 0.036    |
|        | Choline    | 0.078    | Acetate  | 0.047    | Proline       | 0.038    |
|        |            |          |          |          | 4AB           | 0.049    |
|        |            |          |          |          | 2AB           | 0.050    |
|        |            |          |          |          | Taurine       | 0.079    |

**Supplementary Table S2.** Plasma fold change values of metabolites (GC-treated/control) that were identified by 1D <sup>1</sup>H NMR metabolomics. All values are reported in log2 base. Negative values indicate lower concentrations, while values with + sign indicates higher concentration level in the GC-treated group for a given metabolite.

| Major pathway | Metabolite        | 8W    | 12W   | 16W   |
|---------------|-------------------|-------|-------|-------|
| Lipid         | 3-Hydroxybutyrate | +0.01 | +0.40 | +0.23 |
| Lipid         | Acetate           | -0.29 | -0.27 | -0.12 |
| Lipid         | Acetone           | +0.54 | +0.76 | +0.04 |
| Lipid         | Carnitine         | -0.03 | -0.10 | -0.47 |
| Lipid         | Choline           | -0.30 | -0.22 | -0.25 |
| Lipid         | Glycerol          | -0.29 | -0.25 | -0.25 |
| Energy        | Citrate           | -0.27 | +0.21 | +0.07 |
| Energy        | Creatine          | +0.59 | -0.15 | -0.27 |
| Energy        | Creatinine        | +0.70 | +0.04 | -0.25 |
| Energy        | Glucose           | -0.10 | -0.38 | -0.15 |
| Energy        | Lactate           | +0.10 | +0.04 | -0.30 |
| Energy        | Pyruvate          | -0.36 | -0.23 | -0.10 |
| Energy        | Succinate         | -0.84 | +0.20 | +0.14 |
| Amino acid    | 2-Aminobutyrate   | -0.30 | -0.03 | -0.43 |
| Amino acid    | 2-Hydroxybutyrate | -0.09 | -0.29 | +0.03 |
| Amino acid    | 4-Aminobutyrate   | -0.06 | -0.71 | -0.22 |
| Amino acid    | Alanine           | -0.09 | -0.04 | -0.29 |
| Amino acid    | Asparagine        | 0.07  | 0.01  | -0.12 |
| Amino acid    | Glutamate         | -0.51 | -0.12 | -0.62 |
| Amino acid    | Glutamine         | -0.01 | -0.10 | -0.09 |

|            |               |       |       |       |
|------------|---------------|-------|-------|-------|
| Amino acid | Glycine       | 0.00  | -0.17 | -0.17 |
| Amino acid | Isoleucine    | +0.01 | -0.03 | +0.06 |
| Amino acid | Leucine       | -0.09 | -0.12 | -0.01 |
| Amino acid | Lysine        | -0.07 | -0.01 | -0.36 |
| Amino acid | Methionine    | +0.01 | -0.10 | -0.34 |
| Amino acid | Phenylalanine | -0.07 | -0.20 | -0.09 |
| Amino acid | Proline       | +0.06 | +0.07 | -0.36 |
| Amino acid | Serine        | -0.09 | -0.23 | -0.22 |
| Amino acid | Taurine       | +0.01 | -0.15 | -0.51 |
| Amino acid | Threonine     | -0.15 | -0.18 | -0.36 |
| Amino acid | Tryptophan    | -0.06 | +0.11 | -0.22 |
| Amino acid | Tyrosine      | +0.10 | -0.22 | -0.09 |
| Amino acid | Valine        | -0.18 | -0.34 | -0.23 |

**Supplementary Table S3.** Kidney fold change (GC-treated/control) values of metabolites that are identified by 1D <sup>1</sup>H NMR metabolomics. All values are reported in log2 base. Negative values indicate lower concentrations in the GC-treated group for a given metabolite, while + values indicate higher concentration levels in the GC-treated group.

| Major PW             | Metabolite                 | 8W    | 12W   | 16W   |
|----------------------|----------------------------|-------|-------|-------|
| Lipid                | 3-Hydroxybutyrate          | +0.26 | -0.06 | +1.11 |
| Lipid                | Acetate                    | +0.89 | +0.49 | +0.89 |
| Lipid                | Acetone                    | -0.15 | -0.16 | +1.53 |
| Lipid                | Carnitine                  | +0.76 | +0.59 | +1.59 |
| Lipid                | Choline                    | +0.39 | +0.11 | +0.85 |
| Lipid                | Glycerol                   | +0.57 | +0.01 | +1.34 |
| Lipid                | snGlycero-3-PhosphoCholine | +0.12 | +0.03 | +1.58 |
| Energy               | Glucose                    | +0.69 | -0.81 | +0.28 |
| Energy               | Lactate                    | +0.16 | -0.02 | +0.79 |
| Energy               | Citrate                    | +0.41 | 1.00  | +1.44 |
| Energy               | Succinate                  | +0.71 | +0.03 | +0.91 |
| Energy               | Fumarate                   | -1.21 | +0.20 | +0.50 |
| Pentose Phosphate PW | Hypoxanthine               | 0.00  | +0.05 | +0.47 |
| Pentose Phosphate PW | Xanthine                   | -2.48 | +0.36 | +1.77 |
| Pentose Phosphate PW | Inosine                    | -1.80 | -0.53 | +0.49 |
| Pentose Phosphate PW | Uracil                     | +1.45 | +0.28 | +0.72 |
| Pentose Phosphate PW | Uridine                    | -1.04 | -0.23 | +1.45 |
| Pentose Phosphate PW | Myo-Inositol               | +0.27 | +0.52 | +1.73 |
| Amino acid           | Glutathione                | +0.33 | +0.05 | +1.04 |
| Amino acid           | 2-Aminobutyrate            | +0.36 | +0.27 | +1.11 |

|            |                   |       |       |       |
|------------|-------------------|-------|-------|-------|
| Amino acid | 2-Hydroxybutyrate | -0.07 | -0.36 | +1.40 |
| Amino acid | 4-Aminobutyrate   | +0.74 | +0.03 | +1.16 |
| Amino acid | Alanine           | -0.30 | -0.27 | +1.30 |
| Amino acid | Asparagine        | +1.17 | +0.11 | +0.65 |
| Amino acid | Betaine           | +0.74 | +0.61 | +1.02 |
| Amino acid | Creatine          | +0.83 | +0.02 | +0.91 |
| Amino acid | Glutamate         | +0.40 | -0.07 | +1.18 |
| Amino acid | Glutamine         | +0.72 | +0.01 | +1.18 |
| Amino acid | Glycine           | +0.24 | +0.12 | +0.97 |
| Amino acid | Isoleucine        | +1.29 | +0.11 | +0.89 |
| Amino acid | Leucine           | +0.89 | +0.10 | +0.83 |
| Amino acid | Lysine            | +0.62 | +0.16 | +0.64 |
| Amino acid | Niacinamide       | +0.18 | -0.43 | +0.78 |
| Amino acid | Phenylalanine     | +0.22 | +0.03 | +1.05 |
| Amino acid | Serine            | +0.15 | +0.28 | +1.08 |
| Amino acid | Taurine           | +0.61 | -0.01 | +0.55 |
| Amino acid | Threonine         | -0.05 | +0.09 | +1.16 |
| Amino acid | Tryptophan        | +0.59 | +0.29 | +0.94 |
| Amino acid | Tyrosine          | +1.25 | +0.14 | +0.95 |
| Amino acid | Valine            | +0.83 | +0.09 | +0.85 |

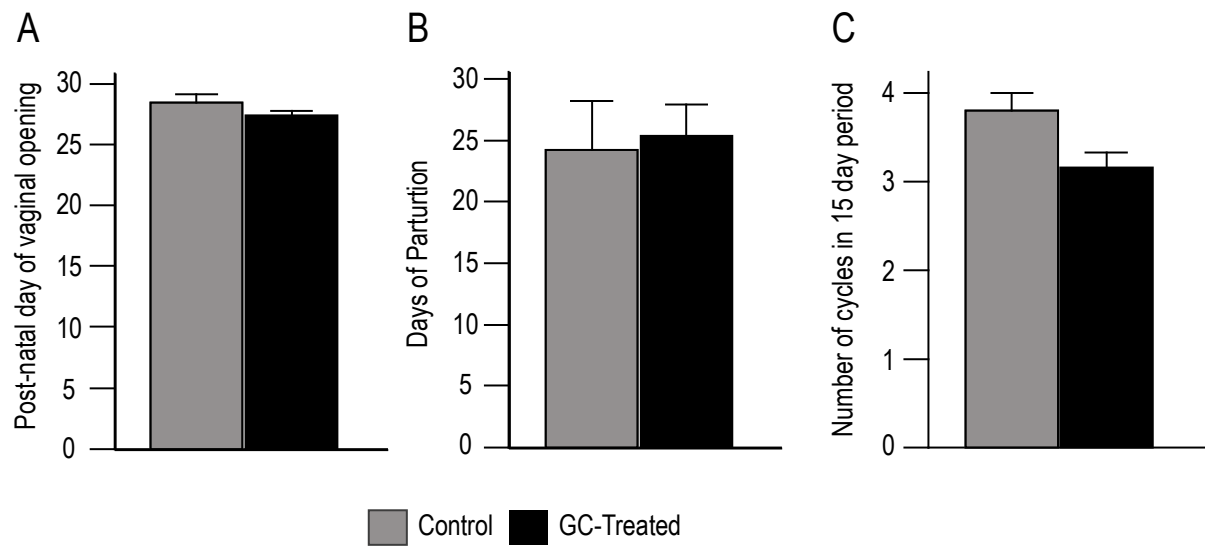

**Supplementary Figure S1:** Differences in vaginal opening, estrous cycle and parturition between GC-treated and control groups. **(A)** The day of vaginal openings **(B)** Number of estrous cycles in a 15 day period and **(C)** Parturition time of female mice after introducing to males in GC-treated (light-gray) and control (dark gray) groups.

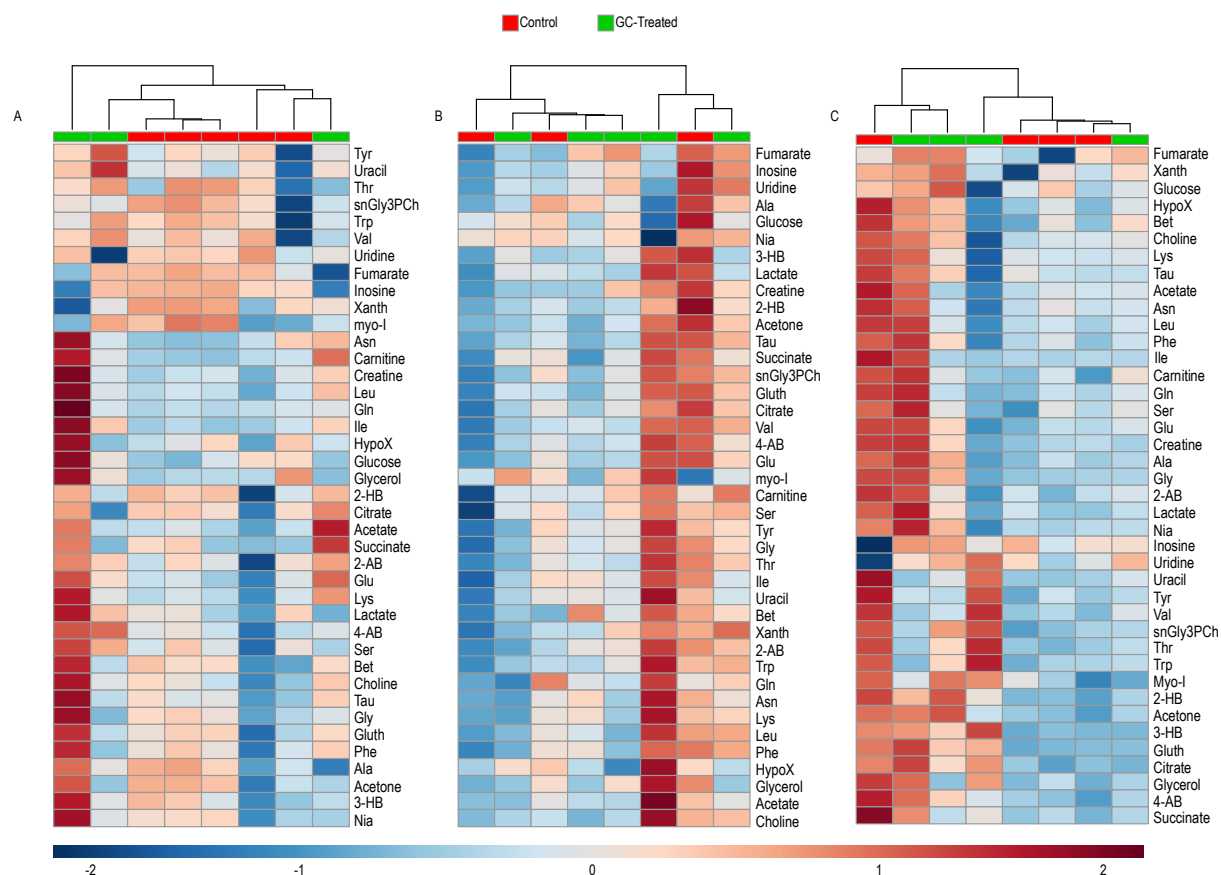

**Supplementary Figure S2.** Heatmap representation of kidney metabolome profiles at: **(A)** eight weeks of age (8W), **(B)** 12 weeks of age (12W) and **(C)** 16 weeks of age (16W) labeled in the heatmap. Individual samples are represented by group labels and are shown as top row in the heatmaps. Red squares denote a mouse in control group, green denotes a mouse in GC-Treated group.

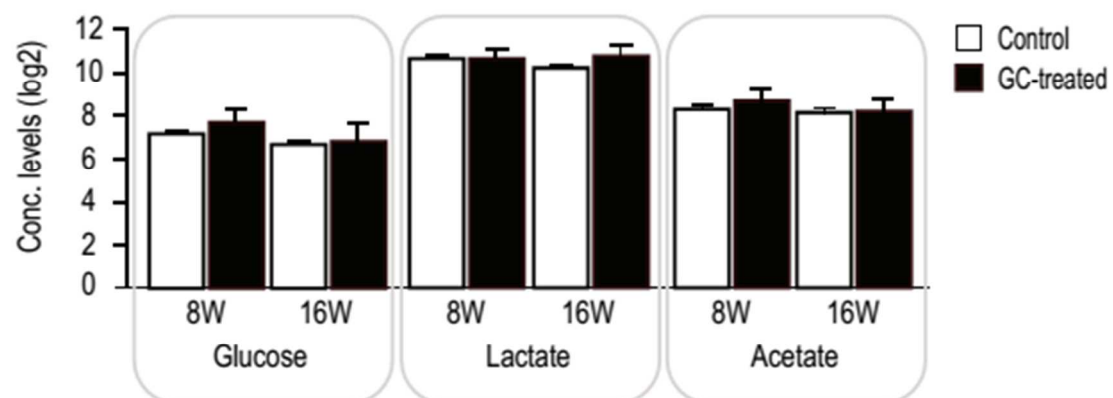

**Supplementary Figure S3.** Relative concentrations levels of glycolytic substrates between GC-treated and control groups are shown for at all-time points.
